# Supplementary material for: Degenerate nonlinear absorption and optical power limiting properties of asymmetrically substituted stilbenoid chromophoresElectronic supplementary information (ESI) available: Experimental details. See http://www.rsc.org/suppdata/jm/b3/b313185h/
Source: Royal Society of Chemistry journal article supplement (doi:10.1039/b313185h), 2004-01-01
Supplement: b313185h.pdf [file b313185h.pdf]

## Supplementary Material

### Degenerate Nonlinear Absorption and Optical Power Limiting Properties of Asymmetrically Substituted Stilbenoid Chromophores

Tzu-Chau Lin, Guang S. He, Paras N. Prasad\* and Loon-Seng Tan

#### Materials

All commercially available reagents for the preparation of the intermediates and model chromophores including triphenylamine, tetrabutylammonium tribromide (TBABr<sub>3</sub>), *p*-toluenesulfonic acid–sodium salt hydrate, poly(ethylene glycol) (PEG-400), bromoethane, 4-nitrobenzyl bromide, triphenylphosphine (P(C<sub>6</sub>H<sub>5</sub>)<sub>3</sub>), *p*-toluic hydrazide, 4-*tert*-butyl benzoyl chloride, phosphorus oxychloride (POCl<sub>3</sub>), *N*-bromosuccinimide (NBS), benzoyl peroxide (BPO), carbon tetrachloride (CCl<sub>4</sub>), *o*-Aminothiophenol, *p*-toluoyl chloride, 1-methyl-2-pyrrolidinone (NMP), styrene, bromobenzene, palladium(II) acetate (Pd(OAc)<sub>2</sub>), tri-*o*-tolylphosphine, triethylamine, acetonitrile, styrene, and bromobenzene were obtained from Aldrich Chemical Co. and were used as received, unless stated otherwise.

#### Measurements

<sup>1</sup>H-NMR spectra were carried out at 300 or 400 MHz. Elementary analysis was performed by Atlantic Microlab, Inc., Norcross, GA. High-resolution mass spectroscopy (HRMS) was conducted by using VG Analytical 70-SE/11-250J mass spectrometer.

#### Synthesis

In Scheme 1, compounds **1** to **5** were synthesized by using established literature processes<sup>[1-3]</sup> and obtained with the yields of 90 % for compound **1**, 85 % for compound **2**, 65 % for compound **3**, and ~80 % for compounds **4** and **5**. The synthesis of the intermediates with oxadiazole (compounds **6**, **7** and **8**) and benzothiazole (compounds **9**, **10** and **11**) functional groups shown in Scheme 2 were carried out by following the literature procedures<sup>[4,5]</sup> and were obtained in overall yields of ~45 % for compound **8** and ~50 % for compound **11**. For the final coupling reactions, the well-known Heck reaction has been followed to prepare the selected model chromophores **Dor**, **Acc**, **S101**, **101**, **BT101** and **N101** as shown in Scheme 3. The details for the preparation and characterization of these model compounds are presented as the following:

#### General synthetic procedure for Heck coupling reaction<sup>[6]</sup>

Aryl bromide (1.0 equiv.), vinylated aryl compounds (1.1 equiv.), tri-*o*-tolylphosphine (TOP, 0.12 equiv.), palladium(II) acetate (0.02 equiv.) and triethylamine (20 ml) were added to a heavy-wall high pressure reaction tube equipped with a magnetic stirrer and a rigid Teflon cap. The reaction mixture was heated up to 110 °C under nitrogen atmosphere and kept at this temperature by means of an oil bath or a heating mantle for

15 hours. After cooling, the reaction mixture was poured into 200ml methanol. The crude product was filtered off and purified either by column chromatography or recrystallization.

#### **Diphenyl-(4-styryl-phenyl)amine (Dor)**

4-Bromo-*N,N*-diphenylaniline (compound **1**, 1.0 equiv.) and styrene (1.0 equiv.) were used as the starting reagents for the preparation of this model chromophore. Following the standard Heck coupling procedure mentioned above (reaction time: 12 hours), the final product (white-yellow powder) was obtained in 70 % yield after recrystallization from acetone. <sup>1</sup>H-NMR (400 MHz; CDCl<sub>3</sub>, ppm): δ 7.56 (d, 2H, *J* = 7.8 Hz), 7.43 (d, 2H, *J* = 7.8 Hz), 7.40 (d, 2H, *J* = 8.0 Hz), 7.33 (d, 1H, *J* = 16 Hz), 7.20 (d, 2H, *J* = 8.0 Hz), 7.17 (m, 1H), 7.15 (d, 1H, *J* = 16 Hz), 7.13 (d, 4H, *J* = 8.4 Hz), 7.10 (d, 6H, *J* = 8.4 Hz); HRMS (EI, 70 eV): calcd for M<sup>+</sup> 347.1674, found 347.1669; Anal. Calcd. For C<sub>26</sub>H<sub>21</sub>N: C, 89.88; H, 6.09; N, 4.03. Found: C, 89.82; H, 6.15; N, 4.05.

#### **2-(4-Styryl-phenyl)-benzothiazole (Acc)**

2-(4-Vinyl-phenyl)-benzothiazole (compound **11**, 1.0 equiv.) and bromobenzene (1.0 equiv.) were used as starting materials for the preparation of this model compound. Following the standard Heck coupling procedure (reaction time: 12 hours), the final product (pale-yellow powder) was obtained in 72.5 % yield after column chromatographic purification method on silica gel using ethyl acetate-hexane (1:4) as the eluent. <sup>1</sup>H-NMR (400 MHz; CDCl<sub>3</sub>, ppm): δ 8.16 (d, 1H, *J* = 8.0 Hz), 8.14 (d, 2H, *J* = 8.0 Hz), 7.98 (d, 1H, *J* = 7.6 Hz), 7.71 (d, 2H, *J* = 8.0 Hz), 7.62 (d, 1H, *J* = 8.0 Hz), 7.58 (m, 1H, *J* = 8.0 Hz), 7.47 (m, 1H, *J* = 7.6 Hz), 7.45 (d, 2H, *J* = 8.0 Hz), 7.37 (d, 1H, *J* = 16 Hz), 7.28 (m, 1H, *J* = 8.0 Hz), 7.20 (d, 1H, *J* = 16 Hz); HRMS (EI, 70 eV): calcd for M<sup>+</sup> 313.0925, found 313.0910; Anal. Calcd. For C<sub>21</sub>H<sub>15</sub>NS: C, 80.44; H, 4.82; N, 4.47. Found: C, 80.44; H, 4.86; N, 4.42.

#### **{4-[2-(4-Ethanesulfonyl-phenyl)-vinyl]-phenyl}-diphenylamine (S101)**

Starting materials: compound **1** (1.0 equiv.) and compound **4** (1.1 equiv.). Reaction time: 18 hours under N<sub>2</sub>. Purification method: column chromatography; eluent: ethyl acetate: hexane = 1:6. Yield: 62 %. Bright yellow solid product. <sup>1</sup>H-NMR (300 MHz; CDCl<sub>3</sub>, ppm): δ 7.84 (d, 2H, *J* = 7.8 Hz), 7.62 (d, 2H, *J* = 7.8 Hz), 7.39 (d, 2H, *J* = 7.8 Hz), 7.28 (d, 2H, *J* = 7.8 Hz), 7.21 (d, 1H, *J* = 16 Hz), 7.15 (d, 1H, *J* = 16 Hz), 7.11 (m, 4H), 7.04 (m, 6H), 3.11 (q, 2H, -SO<sub>2</sub>CH<sub>2</sub>CH<sub>3</sub>, *J* = 6.9 Hz), 1.28 (t, 3H, -SO<sub>2</sub>CH<sub>2</sub>CH<sub>3</sub>, *J* = 6.9 Hz); HRMS (EI, 70 eV): calcd for M<sup>+</sup> 439.1606, found 439.1609; Anal. Calcd. For C<sub>28</sub>H<sub>25</sub>NO<sub>2</sub>S: C, 76.51; H, 5.73; N, 3.19. Found: C, 76.26; H, 5.71; N, 3.17.

#### **[4-(2-{4-[5-(4-*t*-Butyl-phenyl)-[1,3,4]oxadiazol-2-yl]-phenyl}-vinyl)-phenyl]-diphenylamine (101)**

Using compound **1** (1.0 equiv.) and compound **8** (1.1 equiv.) as the starting materials and following the standard procedure of Heck reaction (reaction time: 12 hours) for the synthesis of this chromophore. The yellow solid was then recrystallized from methanol to afford bright yellow crystal product in 63% yield. <sup>1</sup>H-NMR (400 MHz; CDCl<sub>3</sub>, ppm): δ 8.12 (d, 2H, *J* = 8.0 Hz), 8.05 (d, 2H, *J* = 8.0 Hz), 7.70 (d, 2H, *J* = 8.0 Hz), 7.60 (d, 2H, *J* = 8.0 Hz), 7.48 (d, 2H, *J* = 8.0 Hz), 7.34 (d, 2H, *J* = 8.0 Hz), 7.25 (d, 1H, *J* = 16 Hz), 7.20

(m, 4H), 7.13 (m, 6H), 7.07 (d, 1H,  $J = 16$  Hz), 1.372 (s, 9H); HRMS (EI, 70 eV): calcd for  $M^+$  547.2624, found 547.2616; Anal. Calcd. For  $C_{38}H_{33}NO$ : C, 83.33; H, 6.07; N, 7.67. Found: C, 83.63; H, 6.05; N, 7.54.

#### **{4-[2-(4-Benzothiazol-2-yl-phenyl)-vinyl]-phenyl}-diphenylamine (BT101)**

Starting materials: compound **1** (1.0 equiv.) and compound **11** (1.2 equiv.). Reaction time: 18 hours under  $N_2$ . Purification method: column chromatography; eluent: ethyl acetate: hexane = 1:6. Yield: 66 %. Yellow solid.  $^1H$ -NMR (300 MHz;  $CDCl_3$ , ppm, tentative assignment):  $\delta$  8.10 (d, 1H,  $J = 8.0$  Hz), 8.07 (d, 2H,  $J = 8.0$  Hz), 7.92 (d, 1H,  $J = 8.0$  Hz), 7.61 (d, 2H,  $J = 8.0$  Hz), 7.49 (d, 2H,  $J = 8.0$  Hz), 7.42 (d, 1H,  $J = 8.0$  Hz), 7.38 (d, 1H,  $J = 8.0$  Hz), 7.30 (m, 4H), 7.21 (d, 1H,  $J = 16$  Hz), 7.13 (m, 4H,  $J = 8.0$  Hz), 7.07 (m, 4H,  $J = 8.0$  Hz), 7.03 (d, 1H,  $J = 16$  Hz); HRMS (EI, 70 eV): calcd for  $M^+$  480.1660, found 480.1637; Anal. Calcd. For  $C_{33}H_{24}N_2S$ : C, 82.47; H, 5.03; N, 5.83. Found: C, 82.24; H, 5.09; N, 5.69.

#### **{4-[2-(4-Nitro-phenyl)-vinyl]-phenyl}-diphenylamine (N101)**

Starting materials: compound **1** (1.0 equiv.) and compound **5** (1.2 equiv.). Reaction time: 17 hours under  $N_2$ . Purification method: column chromatography; eluent: ethyl acetate: hexane = 1:5. Yield: 58 %. Red powder product.  $^1H$ -NMR (400 MHz;  $CDCl_3$ , ppm):  $\delta$  8.24 (d, 2H,  $J = 8.0$  Hz), 7.66 (d, 2H,  $J = 8.0$  Hz), 7.48 (d, 2H,  $J = 8.0$  Hz), 7.37 (d, 2H,  $J = 8.0$  Hz), 7.26 (d, 1H,  $J = 16$  Hz), 7.20 (m, 4H), 7.09 (m, 6H), 7.11 (d, 1H,  $J = 16$  Hz); HRMS (EI, 70 eV): calcd for  $M^+$  392.1525, found 392.1521; Anal. Calcd. For  $C_{26}H_{20}N_2O_2$ : C, 79.57; H, 5.14; N, 7.14. Found: C, 79.47; H, 5.30; N, 7.14.

## References

- (1) (a) Berthelot, J.; Guette, C.; Essayegh, M.; Desbene, P. L.; Basselier, J. J. *Synth. Commun.* **1986**, *16*, 1641-1645. (b) Kajigaeshi, S.; Kakinami, T.; Okamoto, T.; Fujisaki, S. *Bull. Chem. Soc. Jpn.* **1987**, *60*. (c) Kajigaeshi, S.; Kakinami, T.; Yamasaki, H.; Fujisaki, S.; Okamoto, T. *Bull. Chem. Soc. Jpn.* **1988**, *62*, 2681-2683.
- (2) Sukata, K. *Bull. Chem. Soc. Jpn.* **1984**, *57*, 613-614.
- (3) Shea, K. J.; Stoddart, G. J. *Macromolecules* **1991**, *24*, 1207-1209.
- (4) Hayes, F. N.; Rogers, B. S.; Ott, D. G. *J. Am. Chem. Soc.* **1955**, *77*, 1850-1852.
- (5) Brembilla, A.; Roizard, D.; Lochon, P. *Synth. Commun.* **1990**, *20*, 3379-3384.
- (6) (a) Ziegler, C. B.; Jr.; Heck, R. F. *J. Org. Chem.* **1978**, *43*, 2949-2952. (b) Ziegler, C. B.; Jr.; Heck, R. F. *J. Org. Chem.* **1978**, *43*, 2941-2946. (c) Heck, R. F. *Acc. Chem. Res.* **1979**, *12*, 146-151. (d) Heck, R. F. *Org. Reactions* **1982**, *27*, 345-390. (e) Fischetti, W.; Mak, K. T.; Stakem, F. G.; Kim, J.-I.; Rheingold, A. L.; Heck, R. F. *J. Org. Chem.* **1983**, *48*, 948-955. (f) Mitsudo, T.-A.; Fischetti, W.; Heck, R. F. *J. Org. Chem.* **1984**, *49*, 1640-1646.
